# Supplementary material for: Variations and trends of biologically effective doses of solar ultraviolet radiation in Asia, Europe and South America from 1999 to 2007
Source: Royal Society of Chemistry journal article supplement (doi:10.1039/b906975e), 2009-06-23
Supplement: b906975e.pdf [file b906975e.pdf]

**Table 1.** Summary of solar UV doses determined with spore dosimetry from 2005 to 2007

| Site                | Sodankylä       | Jokioinen       | Brussels        | Thessaloniki    |
|---------------------|-----------------|-----------------|-----------------|-----------------|
| Coordinates         | 67.4°N, 26.7°E  | 60.8°N, 23.5°E  | 50.9°N, 4.4°E   | 40.5°N, 23.0°E  |
| Measurement Period  | 2005/05-2007/12 | 2005/03-2007/12 | 1999/01-2007/12 | 1999/01-2007/12 |
| Mean Monthly SID*   |                 |                 |                 |                 |
| January             | 14              | 35              | 72              | 147             |
| February            | 17              | 53              | 114             | 283             |
| March               | 93              | 164             | 221             | 676             |
| April               | 265             | 288             | 729             | 1611            |
| May                 | 398             | 595             | 828             | 3148            |
| June                | 855             | 1548            | 1513            | 5106            |
| July                | 1191            | 1769            | 2103            | 5400            |
| August              | 652             | 1171            | 1619            | 4357            |
| September           | 187             | 277             | 586             | 2108            |
| October             | 65              | 123             | 229             | 524             |
| November            | 47              | 46              | 116             | 210             |
| December            | 3               | 8               | 82              | 150             |
| Minimum Monthly SID | 2 (2007/12)     | 2 (2006/12)     | 33 (2007/11)    | 42 (2007/11)    |
| Maximum Monthly SID | 1288 (2007/07)  | 2030 (2006/07)  | 2159 (2005/07)  | 7033 (2007/06)  |
| Yearly Total SID**  |                 |                 |                 |                 |
| 2005                | ND              | ND              | 8856(2)         | 22113(0)        |
| 2006                | 4191(0)         | 5868(0)         | 7753(3)         | 18345(4)        |
| 2007                | 3486(0)         | 6038(0)         | 7454(0)         | 26763(0)        |

\* ND, not determined.

\*\* In parenthesis, the number of months with missing data are shown. The estimates were

| <b>Matsumoto</b> | <b>Tokyo</b>    | <b>Kobe</b>     | <b>Kiyotake</b> | <b>Nishihara</b> | <b>Taipei</b>   |
|------------------|-----------------|-----------------|-----------------|------------------|-----------------|
| 36.3°N, 138.0°E  | 35.7°N, 139.7°E | 34.7°N, 135.2°E | 31.9°N, 131.4°E | 26.4°N, 127.9°E  | 25.0°N, 121.5°E |

|                |                 |                 |                 |                 |                 |
|----------------|-----------------|-----------------|-----------------|-----------------|-----------------|
| 1999/1-2007/12 | 1999/01-2007/12 | 1999/01-2007/12 | 1999/01-2007/12 | 1999/01-2006/11 | 2001/11-2007/12 |
|----------------|-----------------|-----------------|-----------------|-----------------|-----------------|

|                |                |                |                |                |                |
|----------------|----------------|----------------|----------------|----------------|----------------|
| 195            | 215            | 201            | 340            | 380            | 273            |
| 347            | 244            | 342            | 414            | 306            | 450            |
| 638            | 566            | 621            | 958            | 1108           | 772            |
| 1190           | 974            | 1382           | 1861           | 915            | 1490           |
| 2385           | 1665           | 1975           | 2928           | 1702           | 4050           |
| 3391           | 687            | 3758           | 4054           | 2326           | 6342           |
| 3059           | 3933           | 4850           | 4657           | 6584           | 7357           |
| 4853           | 4335           | 3980           | 4016           | 4564           | 4754           |
| 1811           | 2114           | 2820           | 1799           | 3501           | 2244           |
| 708            | 688            | 843            | 768            | 1749           | 1367           |
| 337            | 316            | 451            | 510            | 596            | 717            |
| 155            | 144            | 186            | 253            | 371            | 268            |
| 125 (2007/12)  | 116 (2006/12)  | 135 (2007/12)  | 182 (2007/12)  | 306 (2005/02)  | 181 (2005/01)  |
| 5749 (2005/08) | 5158 (2007/07) | 6716 (2007/07) | 5404 (2007/06) | 7948 (2005/07) | 8842 (2005/08) |
| 17224 (2)      | 14850 (1)      | 16243 (1)      | 17955 (0)      | 26353 (2)      | 31744 (0)      |
| 17887 (1)      | 12862 (3)      | 19015 (3)      | 21906 (0)      | ND             | 31099 (1)      |
| 21969 (2)      | 19057 (1)      | 25197 (1)      | 27825 (1)      | ND             | 29683 (0)      |

re made from the mean of the values in the nearest years.

| <b>Padang</b>   | <b>Jakarta</b>  | <b>Denpasar</b> | <b>Valadares</b> | <b>São Martinho</b> | <b>Punta Arenas</b> |
|-----------------|-----------------|-----------------|------------------|---------------------|---------------------|
| 0.9°S, 100.4°E  | 6.2°S, 106.8°E  | 8.6°S, 115.2°E  | 18.9°S, 41.9°W   | 29.5°S, 53.8°W      | 53.2°S, 71.0°W      |
| 1999/11-2007/12 | 1999/01-2007/10 | 1999/01-2006/05 | 2005/07-2007/01  | 2000/03-2004/12     | 2001/05-2004/12     |
| 5487            | 3872            | 8776            | 10697            | 6188                | 1527                |
| 9102            | 3901            | 10396           | 10254            | 3408                | 684                 |
| 7931            | 5847            | 7635            | 3844             | 2219                | 331                 |
| 6411            | 5280            | 9687            | 5463             | 793                 | 133                 |
| 8166            | 6089            | 4575            | 2173             | 461                 | 41                  |
| 7359            | 3955            | 6662            | 4547             | 416                 | 59                  |
| 9344            | 2317            | 5915            | 3844             | 388                 | 103                 |
| 7719            | 4645            | 6913            | 1909             | 444                 | 102                 |
| 6091            | 3329            | 8417            | 1793             | 683                 | 268                 |
| 6024            | 3328            | 9888            | 5784             | 2534                | 521                 |
| 8345            | 5185            | 10391           | 6175             | 5396                | 1087                |
| 8220            | 4290            | 6554            | 6190             | 5554                | 1499                |
| 874 (2007/01)   | 2317 (2007/07)  | 4421 (2005/05)  | 984 (2006/08)    | 197 (2005/05)       | 9 (2007/07)         |
| 11029 (2005/05) | 7417 (2007/03)  | 10396 (2005/02) | 10847 (2007/01)  | 7325 (2006/01)      | 1936 (2005/12)      |
| 94760 (4)       | ND              | 95565 (1)       | ND               | 30771 (2)           | 7614 (1)            |
| 96541 (2)       | ND              | ND              | 57653 (2)        | 31824 (3)           | 6663 (2)            |
| 80627 (0)       | 54975 (3)       | ND              | ND               | 23713 (1)           | 4780 (0)            |
